# Supplementary material
Source: Springer Nature journal article supplement (https://www.springermedizin.de/resource/supplementary/12958_2012_986_MOESM2_ESM.pdf/9566548)

**a**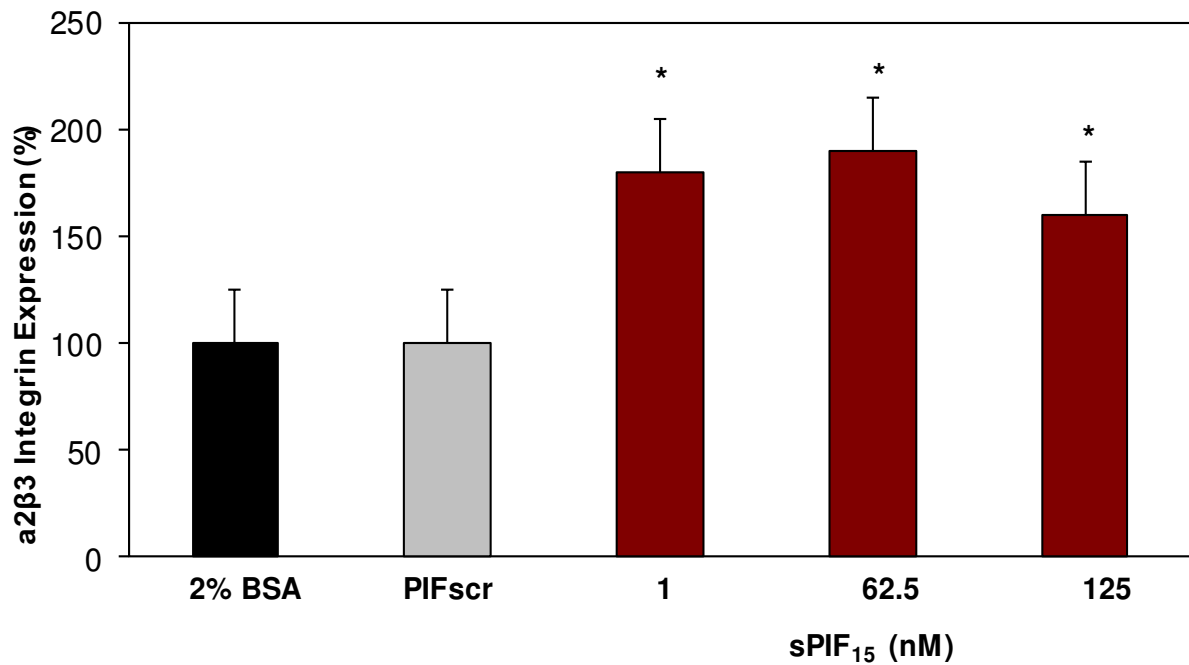**b**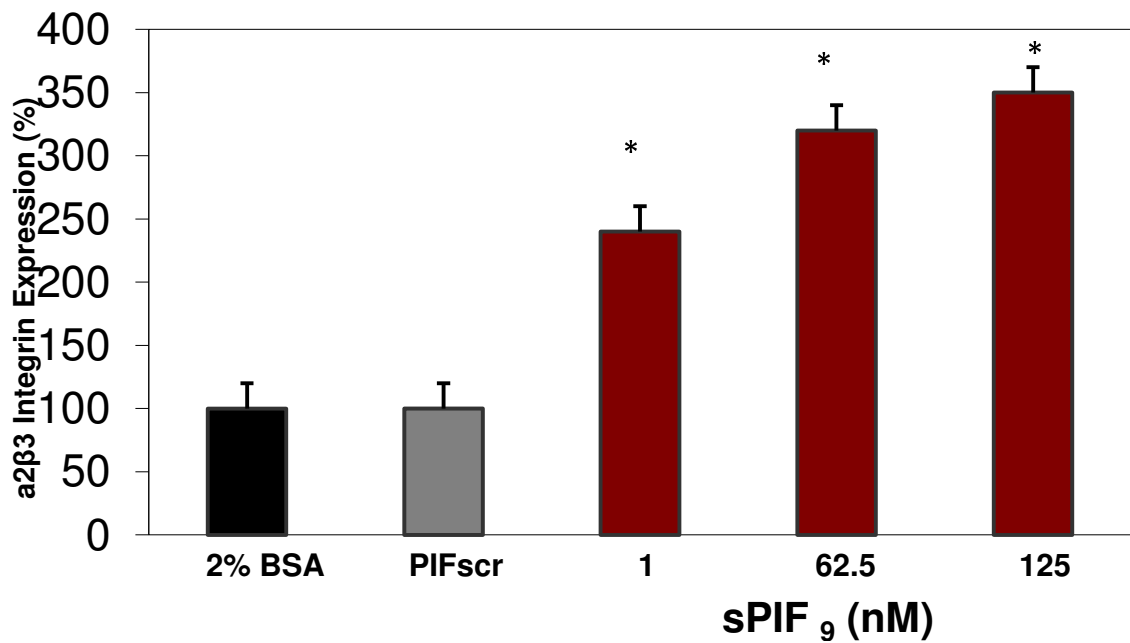

Supplement: MOESM2 [file 9566548]
